# Supplementary material
Source: HighWire-hosted journal article supplement (https://srh.bmj.com/highwire/filestream/141919/field_highwire_adjunct_files/1/bmjsrh-2021-201110supp002_data_supplement.pdf)

Supplementary Figure 2. The percentage acceptance rate towards the four contraceptive mechanisms in women with different religions.

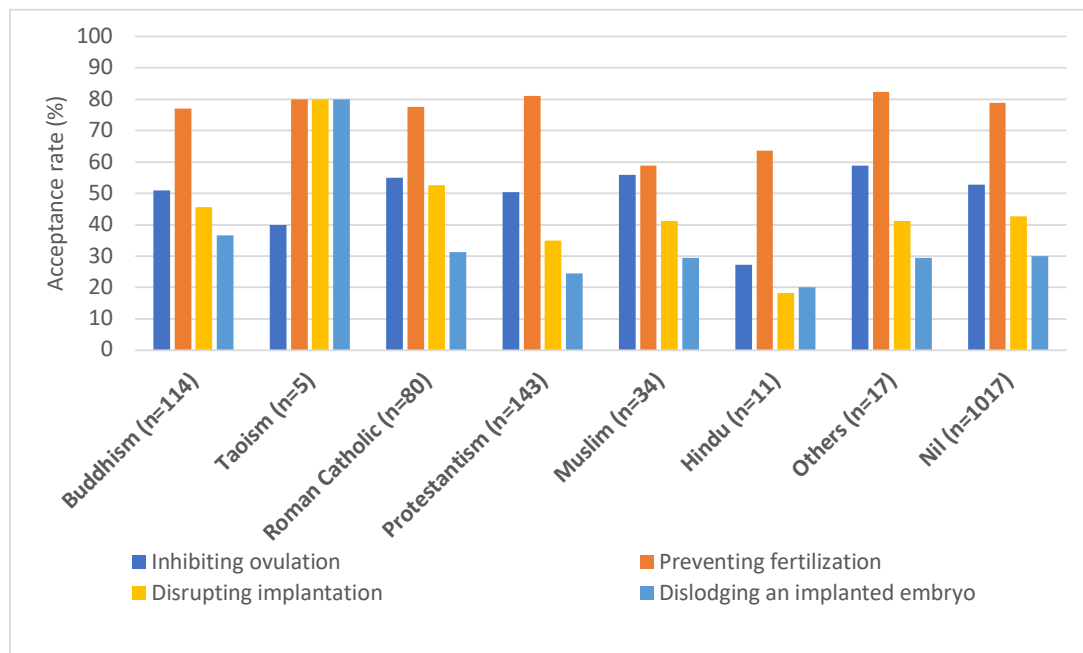

Supplement: bmjsrh-2021-201110supp002_data_supplement.pdf [file bmjsrh-2021-201110supp002_data_supplement.pdf]
